# Supplementary material for: Predicting Protein Dynamics and Allostery Using Multi-Protein Atomic Distance Constraints
Source: PubMed Central journal article supplement (PMC5343748; doi:10.1016/j.str.2017.01.008), 2017-03-07
Supplement: mmc1.pdf [file mmc1.pdf]

**Structure, Volume 25**

**Supplemental Information**

**Predicting Protein Dynamics and Allostery Using  
Multi-Protein Atomic Distance Constraints**

**Joe G. Greener, Ioannis Filippis, and Michael J.E. Sternberg**

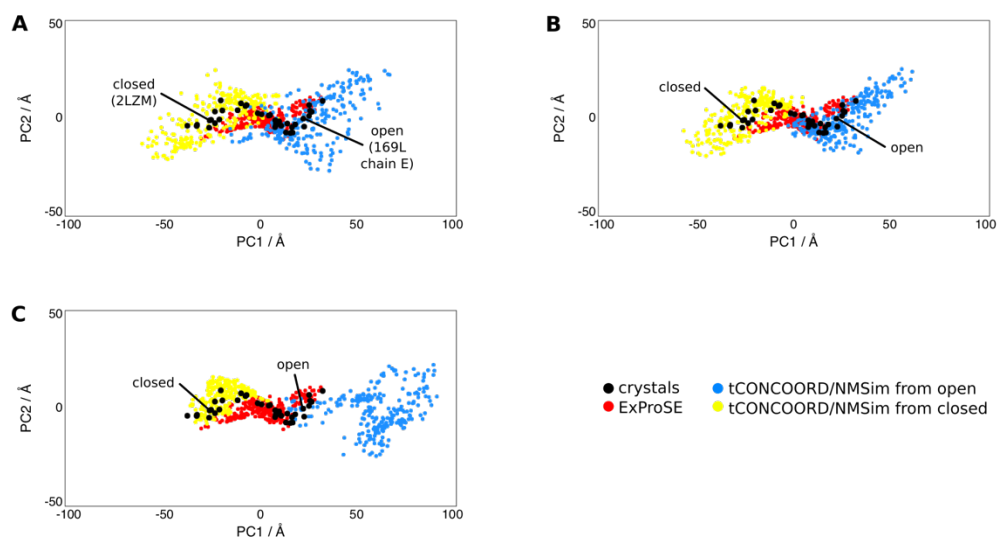

**Figure S1. Related to Figure 1** Ensemble generation for T4-lysozyme with different parameters. Projections of tCONCOORD/NMSim ensembles from the open (blue dots) and closed (yellow dots) structures onto the PCA of the crystal structures are shown. Similar to Figure 1, in each graph the projections of the crystals (black dots) and projections from the ensembles generated with ExProSE (red dots) are also shown. **(A)** tCONCOORD ensembles with the upper bound for long range constraints set to 1.3 Å (default 2.0 Å). **(B)** tCONCOORD ensembles with the upper bound for long range constraints set to 1.3 Å and close pairs not used as constraints. **(C)** NMSim ensembles using the default parameters for small scale motions.

| Method      | Structure(s) used               | Median overall G-factor<br>before energy minimisation | Median overall G-factor<br>after energy minimisation |
|-------------|---------------------------------|-------------------------------------------------------|------------------------------------------------------|
| ExProSE     | open and closed                 | -0.58                                                 | -0.26                                                |
| tCONCOORD   | open                            | -2.23                                                 | -0.31                                                |
| tCONCOORD   | closed                          | -2.09                                                 | -0.27                                                |
| NMSim       | open                            | -0.50                                                 | -0.31                                                |
| NMSim       | closed                          | -0.45                                                 | -0.29                                                |
| targeted MD | starting open, targeting closed | -0.56                                                 | -0.17                                                |
| targeted MD | starting closed, targeting open | -0.57                                                 | -0.20                                                |

**Table S1. Related to Figure 1** Improvement in stereochemical quality on energy minimisation. The structures in each ensemble were analysed with PROCHECK and the median overall G-factor across the ensemble was noted. The median of the overall G-factor of each structure after energy minimisation was also recorded.

| Protein name                                           | Apo PDB | Holo PDB | Apo chains | Holo chains | N   | ExProSE | PARS | STRESS | AlloPred | LIGSITE <sup>cs</sup> | Fpocket |
|--------------------------------------------------------|---------|----------|------------|-------------|-----|---------|------|--------|----------|-----------------------|---------|
| Pyruvate kinase                                        | 1A3X    | 1A3W     | AB         | AB          | 955 |         |      |        |          |                       |         |
| Antithrombin-III                                       | 1ANT    | 3KCG     | I          | I           | 399 |         |      |        |          |                       |         |
| HIV-1 integrase                                        | 1BIZ    | 4CHO     | AB         | AB          | 276 |         |      |        |          |                       |         |
| Chorismate mutase                                      | 1CSM    | 2CSM     | AB         | 2 x A       | 490 |         |      |        |          |                       |         |
| Plasminogen activator inhibitor 1                      | 1DB2    | 4AQH     | A          | A           | 377 |         |      |        |          |                       |         |
| HTH-type transcriptional repressor purR                | 1DBQ    | 1JH9     | AB         | 2 x A       | 550 |         |      |        |          |                       |         |
| Ribose-phosphate pyrophosphokinase                     | 1DKR    | 1DKU     | AB         | AB          | 588 |         |      |        |          |                       |         |
| Fatty acid metabolism regulator protein                | 1E2X    | 1H9G     | 2 x A      | 2 x A       | 444 |         |      |        |          |                       |         |
| Androgen receptor                                      | 1E3G    | 4K7A     | A          | A           | 242 |         |      |        |          |                       |         |
| Herpesvirus protease                                   | 1FL1    | 4P3H     | A          | A           | 153 |         |      |        |          |                       |         |
| Glutamate receptor 2                                   | 1FTO    | 3ILT     | A          | B           | 257 |         |      |        |          |                       |         |
| Annexin A5                                             | 1HVG    | 1HAK     | A          | A           | 313 |         |      |        |          |                       |         |
| Neurolysin, mitochondrial                              | 1I1I    | 4FXY     | P          | P           | 664 |         |      |        |          |                       |         |
| Cell division control protein 4                        | 1NEX    | 3MKS     | AB         | CD          | 572 |         |      |        |          |                       |         |
| Phospho-2-dehydro-3-deoxyheptonate aldolase            | 1OFP    | 1OFR     | AB         | GH          | 628 |         |      |        |          |                       |         |
| Organophosphorus hydrolase                             | 1PTA    | 1QW7     | 2 x A      | AB          | 636 |         |      |        |          |                       |         |
| Ribonucleotide reductase                               | 1RLR    | 3UUS     | A          | A           | 727 |         |      |        |          |                       |         |
| Cytochrome P450 3A4                                    | 1W0E    | 1W0F     | A          | A           | 452 |         |      |        |          |                       |         |
| Acetyl-CoA carboxylase                                 | 1W93    | 1W96     | A          | A           | 549 |         |      |        |          |                       |         |
| Hypothetical biotin--[acetyl-CoA-carboxylase] ligase   | 1WQ7    | 2DVE     | AB         | AB          | 456 |         |      |        |          |                       |         |
| Putative uncharacterized protein PH0207                | 1X0M    | 3ATH     | A          | A           | 403 |         |      |        |          |                       |         |
| Integrin alpha-L                                       | 1ZON    | 1RD4     | A          | A           | 181 |         |      |        |          |                       |         |
| Pyruvate dehydrogenase kinase isoform 2                | 2BTZ    | 2BU2     | 2 x A      | 2 x A       | 708 |         |      |        |          |                       |         |
| Farnesyl pyrophosphate synthase                        | 2F7M    | 3N45     | 2 x F      | 2 x F       | 682 |         |      |        |          |                       |         |
| Fructose-1,6-bisphosphatase                            | 2FBP    | 1Q9D     | AB         | AB          | 630 |         |      |        |          |                       |         |
| Protein arginine N-methyltransferase 3                 | 2FYT    | 3SMQ     | A          | A           | 299 |         |      |        |          |                       |         |
| Glycogen phosphorylase                                 | 2GPN    | 1PYG     | A          | A           | 787 |         |      |        |          |                       |         |
| Glutamate racemase                                     | 2JFX    | 4B1F     | AB         | AB          | 498 |         |      |        |          |                       |         |
| Myosin-2 heavy chain                                   | 2JJ9    | 2JHR     | A          | A           | 692 |         |      |        |          |                       |         |
| Ubiquitin-conjugating enzyme E2 R1                     | 2OB4    | 3RZ3     | A          | A           | 153 |         |      |        |          |                       |         |
| Cytosolic purine 5'-nucleotidase                       | 2XCX    | 2JC9     | 2 x A      | 2 x A       | 916 |         |      |        |          |                       |         |
| cAMP receptor protein                                  | 3D0S    | 3I54     | AB         | AB          | 422 |         |      |        |          |                       |         |
| Endothelial PAS domain-containing protein 1            | 3F1P    | 3H82     | AB         | AB          | 222 |         |      |        |          |                       |         |
| Acetylcholinesterase                                   | 3GEL    | 2J3Q     | A          | A           | 527 |         |      |        |          |                       |         |
| NAD-dependent deacetylase sirtuin-3, mitochondrial     | 3GLU    | 4C7B     | AB         | AB          | 261 |         |      |        |          |                       |         |
| FimX                                                   | 3HV9    | 3HV8     | A          | A           | 242 |         |      |        |          |                       |         |
| Glucokinase                                            | 3IDH    | 4ISE     | A          | A           | 419 |         |      |        |          |                       |         |
| Glutamate receptor ionotropic, NMDA 2B                 | 3JPW    | 3QEL     | A          | B           | 349 |         |      |        |          |                       |         |
| Global nitrogen regulator                              | 3LA7    | 3LA3     | AB         | AB          | 382 |         |      |        |          |                       |         |
| Genome polyprotein                                     | 3MWV    | 4JTZ     | A          | A           | 559 |         |      |        |          |                       |         |
| Beta-lactamase SHV-1                                   | 3N4I    | 1VM1     | A          | A           | 265 |         |      |        |          |                       |         |
| DNA double-strand break repair Rad50 ATPase            | 3QG5    | 3THO     | A          | A           | 349 |         |      |        |          |                       |         |
| N-acetylglutamate kinase / N-acetylglutamate synthase  | 3S7Y    | 4KZT     | AX         | AX          | 862 |         |      |        |          |                       |         |
| Leucine transporter                                    | 3TU0    | 2QEI     | A          | A           | 509 |         |      |        |          |                       |         |
| 6-phosphofructokinase isozyme 2                        | 3UMP    | 3CQD     | AB         | AB          | 612 |         |      |        |          |                       |         |
| Kinesin-like protein KIF11                             | 4A28    | 4BXN     | A          | A           | 330 |         |      |        |          |                       |         |
| Eukaryotic translation initiation factor 4E            | 4BEA    | 4TQC     | A          | A           | 174 |         |      |        |          |                       |         |
| Penicillin binding protein 2 prime                     | 4BL2    | 3ZG0     | A          | A           | 636 |         |      |        |          |                       |         |
| CAMP-dependent protein kinase                          | 4DFY    | 4DFX     | A          | E           | 311 |         |      |        |          |                       |         |
| Casein kinase II                                       | 4DGL    | 3H30     | C          | A           | 333 |         |      |        |          |                       |         |
| Mitogen-activated protein kinase 14                    | 4E5B    | 3NNX     | A          | A           | 321 |         |      |        |          |                       |         |
| PeiD                                                   | 4ETX    | 4ETZ     | A          | A           | 285 |         |      |        |          |                       |         |
| Caspase 7                                              | 4FDL    | 4FEA     | AB         | AB          | 365 |         |      |        |          |                       |         |
| Glucose-1-phosphate thymidyltransferase                | 4HO0    | 4HO9     | A          | A           | 285 |         |      |        |          |                       |         |
| GTPase Kras                                            | 4LPK    | 4LUC     | A          | A           | 156 |         |      |        |          |                       |         |
| CRP transcriptional dual regulator                     | 4N9H    | 4N9I     | AB         | AB          | 402 |         |      |        |          |                       |         |
| 2-C-methyl-D-erythritol 4-phosphate cytidyltransferase | 4NAI    | 2YC3     | 2 x A      | 2 x A       | 428 |         |      |        |          |                       |         |
| Adenylate cyclase type 10                              | 4OYW    | 4USW     | A          | A           | 458 |         |      |        |          |                       |         |

Found in top 2 predicted – out of 58 (54 for STRESS)

27 25 18 26 31 31

**Table S2. Related to Table 3** Performance of allosteric site prediction methods on a dataset of 58 known allosteric proteins. Apo PDB and Holo PDB refer to the PDB IDs of the apo and holo structures used. Apo chains and Holo chains are the chains utilised from the apo and holo structures. 2 x A means chain A is duplicated as part of a biological assembly. *N* is the number of residues in common between the apo and holo chains used. A green square indicates that the method ranked an allosteric pocket first or second for that protein. The definition for an allosteric pocket is given in the experimental procedures. A red square indicates that the method failed to rank an allosteric pocket first or second. STRESS could not run on 4 proteins as they were too small - this is indicated by a yellow square.

Define lower and upper distance constraints  $l_{ij}$  and  $u_{ij}$  for atom pairs  $i$  and  $j$   
Define an initial learning rate  $\lambda_d = 1.0$   
Randomise atomic coordinates  $x_i$  within a cube of 100 Å  
**for**  $C$  cycles **do**  
    **for**  $S$  steps **do**  
        Randomly select a pair of atoms  $i$  and  $j$  for which a constraint exists  
        Compute the distance  $d_{ij} = \|x_i - x_j\|$   
        **if**  $d_{ij} < l_{ij}$  or  $d_{ij} > u_{ij}$  **then**  
            Update the coordinates  $x_i$  and  $x_j$  by

$$x_i = x_i + \frac{\lambda_d t_{ij} - d_{ij}}{2 d_{ij}} (x_i - x_j)$$

$$x_j = x_j + \frac{\lambda_d t_{ij} - d_{ij}}{2 d_{ij}} (x_j - x_i)$$

        where  $t_{ij}$  is the nearest constraint to  $d_{ij}$   
        **end if**  
    **end for**  
    Decrease the learning rate  $\lambda_d$  by  $1/C$   
**end for**

**Algorithm S1. Related to the Experimental Procedures** The stochastic proximity embedding (SPE) algorithm used to move atoms to satisfy distance constraints. Rephrased from Agrafiotis et al. 2013.

Set score  $s = 0$   
**for** each atom pair  $i, j$  with a distance constraint **do**  
    **if**  $d_{ij} < l_{ij}$  or  $d_{ij} > u_{ij}$  **then**  
        Increase  $s$  by

$$\frac{(d_{ij} - t_{ij})^2}{\max(u_{ij} - l_{ij}, 0.001)}$$

        where  $t_{ij}$  is the nearest constraint to  $d_{ij}$   
    **end if**  
**end for**

**Algorithm S2. Related to the Experimental Procedures** The scoring algorithm to calculate the SPE error score. Rephrased from Agrafiotis et al. 2013.
